# Supplementary material for: Statin Use Decreases the Incidence of Hepatocellular Carcinoma: An Updated Meta-Analysis
Source: Cancers (Basel). 2020 Apr 3;12(4):874. doi: 10.3390/cancers12040874 (PMC7225931; doi:10.3390/cancers12040874)
Supplement: Supplementary file 1 [file cancers-12-00874-s001.pdf]

Table S1. Risk of bias assessment and quality of included studies.

| Observational Studies <sup>a</sup>        |   |   |           |               |   |         |                 |   |
|-------------------------------------------|---|---|-----------|---------------|---|---------|-----------------|---|
|                                           |   |   | Selection | Comparability |   | Outcome | Overall quality |   |
| Björkhem-Bergman 2014                     |   |   | ***       | **            |   | **      | H               |   |
| Butt 2015                                 |   |   | ***       | **            |   | **      | H               |   |
| Chang 2017                                |   |   | ***       | **            |   | **      | H               |   |
| Chen 2014                                 |   |   | ***       | **            |   | **      | H               |   |
| El-Serag 2009                             |   |   | ***       | **            |   | **      | H               |   |
| Friedman 2016                             |   |   | *         | *             |   | *       | L               |   |
| German 2019                               |   |   | **        | **            |   | **      | H               |   |
| Goh 2019                                  |   |   | **        | **            |   | **      | H               |   |
| Hsiang 2015                               |   |   | *         | *             |   | *       | L               |   |
| Kaplan 2019                               |   |   | ***       | **            |   | **      | H               |   |
| Kim 2018                                  |   |   | **        | **            |   | **      | H               |   |
| King 2013                                 |   |   | *         | *             |   | *       | L               |   |
| Lai 2013                                  |   |   | ***       | **            |   | **      | H               |   |
| McGlynn 2014                              |   |   | ***       | **            |   | **      | H               |   |
| McGlynn 2015                              |   |   | ***       | **            |   | **      | H               |   |
| Mohanty 2016                              |   |   | *         | *             |   | *       | L               |   |
| Simon 2019                                |   |   | **        | **            |   | **      | H               |   |
| Tran 2019                                 |   |   | **        | **            |   | **      | H               |   |
| Tsan 2012                                 |   |   | **        | **            |   | **      | H               |   |
| Tsan 2013                                 |   |   | **        | **            |   | **      | H               |   |
| Marelli 2011                              |   |   | **        | *             |   | *       | L               |   |
| Friis 2005                                |   |   | **        | **            |   | **      | H               |   |
| Randomized Controlled trials <sup>b</sup> |   |   |           |               |   |         |                 |   |
|                                           | 1 | 2 | 3         | 4             | 5 | 6       | 7               |   |
| Sato 2006                                 | L | L | L         | L             | L | L       | L               | H |
| Matsushita 2010                           | L | L | L         | L             | L | L       | L               | H |
| Emberson 2012                             | L | L | L         | L             | L | L       | L               | H |

L, low; H, high; U, unclear; M, moderate.

<sup>a</sup> Study quality assessment performed by means of Newcastle/Ottawa scale (each asterisk represents if the respective criterion within the subsection was satisfied)

<sup>b</sup> Cochrane Collaboration's tool for assessing the risk of bias across 7 domains: 1 (Random sequence generation), 2 (Allocation concealment), 3 (Blinding of participants and personnel), 4 (Blinding of outcome assessment), 5 (Incomplete outcome data), 6 (Selective reporting) and 7 (Other bias).
